# Supplementary material for: Fast and accurate edge orientation processing during object manipulation
Source: eLife. 2018 Apr 3;7:e31200. doi: 10.7554/eLife.31200 (PMC5922971; doi:10.7554/eLife.31200)
Supplement: Figure 2—source data 1. [file elife-31200-fig2-data1.xlsx]

## Sheet: Sheet1
Fig. 2b. Absolute alignment error (deg). Particioanst' medians.
	Edge length (mm)	0	1	2	4	8	Inf
	Subject 1	20.42	14.09	8.44955	6.7009	4.277	2.9335
	2	22.5955	23.684	9.70455	4.3747	3.2469	2.7298
	3	21.675	14.308	6.8415	4.7605	3.3279	2.3178
	4	20.322	18.6075	13.5525	7.5545	4.69815	2.99605
	5	19.77	18.14	12.275	5.87535	4.442	3.50115
	6	19.431	18.47	15.218	6.8885	4.5914	2.254
	7	25.93	12.52	9.2597	4.10225	3.5355	2.6726
	8	23.225	18.039	15.254	6.3614	4.0121	4.0138
	9	24.17	14.2	11.647	6.2935	4.1633	2.70005
	10	25.703	16.001	8.7442	6.32165	3.98565	3.0716
Fig. 2d. P(correct) rotation direction
	Edge length (mm)	0	1	2	4	8	Inf
	Subject 1	0.50926	0.60185	0.75926	0.92593	0.98148	0.9537
	2	0.48148	0.44444	0.72222	0.88889	0.98113	1
	3	0.4486	0.58878	0.83333	0.96296	0.97196	0.98131
	4	0.4486	0.52778	0.62037	0.85185	0.9537	0.98148
	5	0.49533	0.55556	0.68519	0.94444	0.98131	0.99074
	6	0.52778	0.49533	0.63889	0.85185	0.93519	1
	7	0.48148	0.64486	0.74074	0.97222	0.96296	1
	8	0.48148	0.50926	0.60185	0.84259	0.94444	0.97222
	9	0.41121	0.57009	0.65741	0.84259	0.97222	1
	10	0.40741	0.55556	0.78704	0.83962	0.96296	0.99074
Fig. 2f. Displavement towards target (deg). Participants' medians.
	Edge length (mm)	0	0	0	1	1	1	2	2	2	4	4	4	8	8	8	Inf	Inf	Inf
	Initial position (deg)	±10	±20	±30	±10	±20	±30	±10	±20	±30	±10	±20	±30	±10	±20	±30	±10	±20	±30
	Subject 1	13.0492	11.9323	11.3682	13.6656	15.0793	14.6263	12.8859	17.2055	19.5579	12.014	16.7137	23.0162	12.7872	18.6242	25.6464	10.3482	17.7921	29.4564
	2	18.7844	14.6702	16.0471	14.7029	17.5821	15.0725	17.6978	18.9045	20.4792	13.8492	18.9914	25.998	12.5617	17.9923	27.6005	10.6362	18.6089	28.3932
	3	13.7789	13.7273	13.4381	14.5943	23.0505	24.3091	16.7726	20.1022	24.6959	14.4407	19.0592	25.5369	11.7105	18.5247	25.54	9.76891	19.7153	28.0116
	4	12.1729	11.1785	12.0261	10.6801	9.73083	13.5995	17.335	15.8633	16.7385	15.4449	20.3582	20.9353	13.5597	18.6025	25.5796	13.359	19.4454	29.9444
	5	11.4503	11.2007	11.2424	12.5356	13.6512	13.6776	13.7135	15.482	16.2767	11.7425	16.3122	20.5035	11.1534	16.9154	23.7948	12.536	18.931	28.2059
	6	14.8397	14.5766	15.918	9.27711	10.4218	13.1395	11.3812	14.5057	14.091	13.2357	15.7702	19.7368	12.0561	17.4617	23.0028	10.7301	18.4223	28.0114
	7	18.145	23.421	20.3045	20.1361	19.5561	22.3319	15.8771	19.5887	26.3647	16.4888	18.3858	25.2477	12.4881	21.6821	29.8501	12.3633	20.0528	31.8414
	8	16.8305	19.2867	18.0517	15.8288	15.8215	14.0278	17.0866	15.9229	16.4665	17.4843	17.938	26.6953	15.2565	20.6508	25.9927	14.6721	21.2785	29.591
	9	13.6653	10.6145	13.5809	15.3521	15.8301	19.3354	12.7071	18.1324	16.7808	18.1215	18.9452	23.3256	14.0714	19.1396	25.9535	13.3113	20.754	29.1205
	10	22.6972	17.2385	19.558	17.3623	21.4188	18.3356	21.8629	20.258	23.4739	17.7252	22.7459	24.9628	15.4873	19.9855	26.414	13.0149	22.0809	30.4669
