# Supplementary material for: Fast and accurate edge orientation processing during object manipulation
Source: eLife. 2018 Apr 3;7:e31200. doi: 10.7554/eLife.31200 (PMC5922971; doi:10.7554/eLife.31200)
Supplement: Figure 3—source data 1. [file elife-31200-fig3-data1.xlsx]

## Sheet: Sheet1
Fig. 3a. Rotation ondet time (s). Participants' medians.
	Edge length (mm)	2	4	8	Inf
	Subject 1	0.1821	0.18229	0.18487	0.18322
	2	0.19038	0.19157	0.18692	0.19531
	3	0.18825	0.18557	0.17912	0.17131
	4	0.21697	0.21478	0.21328	0.21756
	5	0.18737	0.21725	0.19482	0.20687
	6	0.21537	0.22953	0.24209	0.24724
	7	0.18794	0.21885	0.21275	0.20503
	8	0.2121	0.20338	0.21353	0.21228
	9	0.19828	0.19937	0.21878	0.21331
	10	0.18678	0.17812	0.18819	0.18053
Fig. 3b. Time of contact force increase (s). Participants' medians.
	Edge length (mm)	2	4	8	Inf
	Subject 1	0.2775	0.25945	0.24593	0.26576
	2	0.41971	0.42966	0.41362	0.43935
	3	0.31549	0.30653	0.27763	0.29175
	4	0.2706	0.23603	0.20813	0.2196
	5	0.34815	0.36725	0.33907	0.36159
	6	0.40135	0.4251	0.35757	0.42937
	7	0.30047	0.31089	0.30157	0.30556
	8	0.14287	0.15055	0.13762	0.14772
	9	0.40281	0.41003	0.44808	0.44288
	10	0.26087	0.23362	0.23272	0.24319
Fig. 3c. Contact force at rotation onset (N). Participants' medians.
	Edge length (mm)	2	4	8	Inf
	Mean	Mean	Mean	Mean	Mean
	Subject 1	0.8675	0.82175	0.89015	0.96925
	2	2.0465	1.6615	1.6495	1.473
	3	0.83705	0.9921	1.041	1.088
	4	1.234	1.0685	0.9834	1.0705
	5	1.266	1.105	1.379	1.681
	6	0.9635	1.11949	0.662	0.69505
	7	0.54735	0.60115	0.74225	0.9807
	8	1.0695	1.148	1.02	1.0105
	9	2.1495	2.051	2.245	1.8305
	10	0.8958	0.7564	0.76475	0.7447
Fig. 3d. Ptateau contact force (N). Participants' medians.
	Edge length (mm)	2	4	8	Inf
	Mean	Mean	Mean	Mean	Mean
	Subject 1	0.2775	0.25945	0.24593	0.26576
	2	0.41971	0.42966	0.41362	0.43935
	3	0.31549	0.30653	0.27763	0.29175
	4	0.2706	0.23603	0.20813	0.2196
	5	0.34815	0.36725	0.33907	0.36159
	6	0.40135	0.4251	0.35757	0.42937
	7	0.30047	0.31089	0.30157	0.30556
	8	0.14287	0.15055	0.13762	0.14772
	9	0.40281	0.41003	0.44808	0.44288
	10	0.26087	0.23362	0.23272	0.24319
Fig. 3e. Rotation duration (s). Participants' medians.
	Edge length (mm)	2	2	2	2	2	2	4	4	4	4	4	4	8	8	8	8	8	8	Inf	Inf	Inf	Inf	Inf	Inf
	Initial position (deg)	-30	-20	-10	10	20	30	-30	-20	-10	10	20	30	-30	-20	-10	10	20	30	-30	-20	-10	10	20	30
	Mean	Mean	Mean	Mean	Mean	Mean	Mean	Mean	Mean	Mean	Mean	Mean	Mean	Mean	Mean	Mean	Mean	Mean	Mean	Mean	Mean	Mean	Mean	Mean
	Subject 1	0.41253	0.37452	0.26457	0.36316	0.34771	0.328	0.42737	0.37605	0.42921	0.2785	0.32207	0.36234	0.39021	0.40418	0.456	0.317	0.34784	0.407	0.62196	0.54646	0.53751	0.39403	0.49734	0.45275
	2	0.48803	0.42878	0.44243	0.37774	0.4076	0.38999	0.36074	0.42253	0.34099	0.35603	0.36843	0.42103	0.44203	0.40649	0.366	0.36157	0.45003	0.49708	0.48321	0.48151	0.39049	0.35976	0.38919	0.53437
	3	0.55894	0.44671	0.43096	0.57943	0.52653	0.58446	0.46174	0.44921	0.37996	0.50867	0.46553	0.48946	0.49674	0.49446	0.36523	0.42793	0.3675	0.62353	0.59553	0.38678	0.31943	0.35301	0.40878	0.47003
	4	0.34053	0.41598	0.37393	0.33801	0.35046	0.37193	0.47303	0.48903	0.37803	0.37949	0.36543	0.407	0.52264	0.46403	0.41198	0.29768	0.36896	0.37671	0.51848	0.40503	0.3495	0.36007	0.39096	0.47858
	5	0.52693	0.50405	0.50203	0.56978	0.47253	0.45824	0.63599	0.59574	0.47796	0.49896	0.58301	0.61649	0.67774	0.52624	0.40053	0.45903	0.56846	0.59753	0.69399	0.64124	0.47903	0.46573	0.58571	0.59903
	6	0.43221	0.45226	0.485	0.322	0.43153	0.47793	0.59898	0.46696	0.41649	0.48082	0.53393	0.58451	0.55351	0.49096	0.37151	0.43521	0.49078	0.63753	0.65503	0.60346	0.44124	0.49998	0.55923	0.67049
	7	0.49403	0.54446	0.46703	0.34628	0.45103	0.54603	0.48803	0.45246	0.40253	0.33096	0.39776	0.45871	0.44653	0.40749	0.39557	0.27103	0.45121	0.52146	0.58878	0.45899	0.37653	0.36464	0.41912	0.55828
	8	0.31547	0.375	0.28572	0.2693	0.30943	0.329	0.43296	0.39212	0.385	0.37901	0.34796	0.33726	0.41394	0.36124	0.328	0.40193	0.402	0.44046	0.37372	0.39647	0.39871	0.492	0.59649	0.44239
	9	0.38571	0.51057	0.399	0.54821	0.64846	0.47801	0.51146	0.46303	0.51703	0.463	0.472	0.499	0.52198	0.47998	0.42503	0.50101	0.46303	0.63851	0.63553	0.4595	0.43149	0.355	0.502	0.52553
	10	0.4325	0.44593	0.43475	0.41387	0.43993	0.357	0.4815	0.36157	0.489	0.384	0.399	0.46357	0.50371	0.38653	0.39223	0.35293	0.42747	0.46093	0.60844	0.53698	0.31421	0.39871	0.38171	0.43493
