# Supplementary material for: Fast and accurate edge orientation processing during object manipulation
Source: eLife. 2018 Apr 3;7:e31200. doi: 10.7554/eLife.31200 (PMC5922971; doi:10.7554/eLife.31200)
Supplement: Figure 4—source data 1. [file elife-31200-fig4-data1.xlsx]

## Sheet: Sheet1
Fig. 4b. Absolute alignment error (deg). Participants' medians.
	Task (Edge )	Tactile (inf)	Visual (0 mm)
	Subject 1	2.9335	2.3682
	2	2.7298	2.36055
	3	2.3178	1.90505
	4	2.99605	3.08075
	5	3.50115	2.2795
	6	2.254	2.07065
	7	2.6726	1.526
	8	4.0138	2.1072
	9	2.70005	1.20925
	10	3.0716	2.243
