# Supplementary material for: Fast and accurate edge orientation processing during object manipulation
Source: eLife. 2018 Apr 3;7:e31200. doi: 10.7554/eLife.31200 (PMC5922971; doi:10.7554/eLife.31200)
Supplement: Figure 5—source data 1. [file elife-31200-fig5-data1.xlsx]

## Sheet: Sheet1
Fig. 5C - Model output, 100 simulations for edge length.
		Discrimination Angle (Degrees)
	Length	With Subfields	Without Subfields
	1 mm	25	18.5
	1 mm	8	46
	1 mm	8	2.5
	1 mm	11	90
	1 mm	25	29
	1 mm	1.5	4.5
	1 mm	4.5	15
	1 mm	24	55
	1 mm	43	21
	1 mm	2.5	56
	1 mm	1	40
	1 mm	0.5	42
	1 mm	1	48
	1 mm	0	30
	1 mm	14.5	3.5
	1 mm	26	33
	1 mm	0	52
	1 mm	8.5	33
	1 mm	7	2.5
	1 mm	17.5	9
	1 mm	6	90
	1 mm	18.5	16
	1 mm	11.5	29
	1 mm	21	38
	1 mm	6	14.5
	1 mm	14.5	12
	1 mm	4	41
	1 mm	10	15
	1 mm	17.5	62
	1 mm	6	63
	1 mm	26	61
	1 mm	41	35
	1 mm	1	90
	1 mm	6	17.5
	1 mm	2.5	90
	1 mm	8.5	59
	1 mm	16	21
	1 mm	7.5	26
	1 mm	17	10.5
	1 mm	34	26
	1 mm	11	36
	1 mm	0	90
	1 mm	19	64
	1 mm	19.5	15.5
	1 mm	34	45
	1 mm	41	43
	1 mm	90	19.5
	1 mm	4	50
	1 mm	0.5	90
	1 mm	6	39
	1 mm	26	46
	1 mm	6	90
	1 mm	0.5	26
	1 mm	0.5	32
	1 mm	14	6
	1 mm	60	90
	1 mm	9	60
	1 mm	11	36
	1 mm	2	34
	1 mm	5.5	40
	1 mm	24	14
	1 mm	18.5	45
	1 mm	18	25
	1 mm	7	25
	1 mm	18	18
	1 mm	31	29
	1 mm	26	90
	1 mm	2.5	70
	1 mm	11	19.5
	1 mm	3	35
	1 mm	10.5	13.5
	1 mm	2	20
	1 mm	4.5	76
	1 mm	1.5	4.5
	1 mm	11.5	44
	1 mm	17.5	48
	1 mm	13.5	32
	1 mm	2.5	90
	1 mm	9	81
	1 mm	16	51
	1 mm	18.5	90
	1 mm	19.5	90
	1 mm	32	90
	1 mm	9.5	21
	1 mm	11.5	90
	1 mm	17	46
	1 mm	2	42
	1 mm	1.5	38
	1 mm	11.5	72
	1 mm	1	12.5
	1 mm	13.5	90
	1 mm	6	32
	1 mm	0	18.5
	1 mm	0.5	43
	1 mm	14.5	9.5
	1 mm	18.5	18
	1 mm	1	30
	1 mm	10	27
	1 mm	10.5	14
	1 mm	6	55
	2 mm	15.5	44
	2 mm	8	32
	2 mm	2	14
	2 mm	2.5	36
	2 mm	2.5	29
	2 mm	4.5	20
	2 mm	3	20
	2 mm	0.5	19.5
	2 mm	1	21
	2 mm	2.5	45
	2 mm	6	10.5
	2 mm	0.5	14
	2 mm	1	9
	2 mm	0	16.5
	2 mm	2.5	16.5
	2 mm	5	7
	2 mm	17	19.5
	2 mm	5	6.5
	2 mm	1	3.5
	2 mm	10	32
	2 mm	8.5	30
	2 mm	13	8
	2 mm	0	21
	2 mm	18	6
	2 mm	6	17.5
	2 mm	14.5	29
	2 mm	1.5	26
	2 mm	6	16
	2 mm	17.5	58
	2 mm	6	16.5
	2 mm	9	18
	2 mm	4.5	12
	2 mm	4	43
	2 mm	6	45
	2 mm	14	70
	2 mm	2.5	45
	2 mm	13.5	16.5
	2 mm	4	4
	2 mm	7	38
	2 mm	0.5	15
	2 mm	2	15.5
	2 mm	9	30
	2 mm	9.5	28
	2 mm	15	8
	2 mm	0	24
	2 mm	2	16.5
	2 mm	15.5	1.5
	2 mm	6	25
	2 mm	22	43
	2 mm	8	30
	2 mm	10.5	34
	2 mm	3.5	6
	2 mm	0.5	20
	2 mm	2.5	22
	2 mm	9	17
	2 mm	2.5	35
	2 mm	9	14.5
	2 mm	8	26
	2 mm	1	28
	2 mm	1.5	14.5
	2 mm	9	30
	2 mm	1.5	37
	2 mm	4	18.5
	2 mm	7	23
	2 mm	2.5	8.5
	2 mm	0	14
	2 mm	15.5	23
	2 mm	2	35
	2 mm	5	5.5
	2 mm	1.5	23
	2 mm	4	12
	2 mm	6	33
	2 mm	6	37
	2 mm	6.5	7.5
	2 mm	4	8
	2 mm	1	28
	2 mm	9	18
	2 mm	2	21
	2 mm	8.5	34
	2 mm	2	21
	2 mm	18.5	16.5
	2 mm	6.5	16.5
	2 mm	7.5	6.5
	2 mm	0	17
	2 mm	0	27
	2 mm	6	15
	2 mm	4	38
	2 mm	1.5	14
	2 mm	10	31
	2 mm	1	32
	2 mm	0	43
	2 mm	2.5	48
	2 mm	17.5	36
	2 mm	0.5	43
	2 mm	3.5	9
	2 mm	14.5	37
	2 mm	1	20
	2 mm	7	21
	2 mm	3.5	12
	2 mm	0.5	19
	4 mm	7	10.5
	4 mm	5	20
	4 mm	2	6.5
	4 mm	2.5	18.5
	4 mm	2.5	13
	4 mm	3.5	11
	4 mm	3	10
	4 mm	0.5	8.5
	4 mm	2	14
	4 mm	3	24
	4 mm	5.5	13.5
	4 mm	4	6
	4 mm	1.5	4
	4 mm	4.5	4.5
	4 mm	2.5	12
	4 mm	3	1.5
	4 mm	8	15.5
	4 mm	3.5	24
	4 mm	4	6.5
	4 mm	9.5	12.5
	4 mm	6.5	14
	4 mm	5	8
	4 mm	3.5	18.5
	4 mm	6	6.5
	4 mm	1	4.5
	4 mm	8	6.5
	4 mm	1.5	18.5
	4 mm	3	6.5
	4 mm	1	27
	4 mm	2	18.5
	4 mm	2.5	28
	4 mm	3	11
	4 mm	6.5	11
	4 mm	5.5	18
	4 mm	1.5	30
	4 mm	2.5	27
	4 mm	1.5	17
	4 mm	4	6.5
	4 mm	1.5	25
	4 mm	0.5	20
	4 mm	2	16.5
	4 mm	1	23
	4 mm	8.5	19
	4 mm	7.5	22
	4 mm	1	5
	4 mm	1.5	15.5
	4 mm	0.5	23
	4 mm	4.5	18.5
	4 mm	2	21
	4 mm	2	30
	4 mm	4	18.5
	4 mm	2.5	11
	4 mm	4.5	14
	4 mm	2.5	16
	4 mm	2.5	18.5
	4 mm	1.5	10.5
	4 mm	5.5	11.5
	4 mm	4	9
	4 mm	7	19
	4 mm	2.5	4.5
	4 mm	7.5	12.5
	4 mm	1.5	23
	4 mm	3	18
	4 mm	5.5	13
	4 mm	2.5	21
	4 mm	5.5	8
	4 mm	2	2
	4 mm	2	6
	4 mm	3	5.5
	4 mm	3	10
	4 mm	3.5	13.5
	4 mm	3.5	20
	4 mm	4.5	20
	4 mm	2.5	15.5
	4 mm	4	15.5
	4 mm	1	19.5
	4 mm	3.5	4.5
	4 mm	2	16
	4 mm	6	19.5
	4 mm	9.5	18.5
	4 mm	5	13
	4 mm	5	9
	4 mm	6	16
	4 mm	0	9
	4 mm	4.5	13
	4 mm	3.5	18
	4 mm	2	20
	4 mm	1.5	15
	4 mm	5	24
	4 mm	8	9
	4 mm	4	15.5
	4 mm	2	29
	4 mm	1.5	9
	4 mm	1	32
	4 mm	2.5	10.5
	4 mm	0	8.5
	4 mm	1.5	16.5
	4 mm	2	6
	4 mm	1	12
	4 mm	2	15.5
	8 mm	2	8.5
	8 mm	1	15.5
	8 mm	1.5	9
	8 mm	1.5	8
	8 mm	2.5	13
	8 mm	2	11.5
	8 mm	2	5
	8 mm	1	8.5
	8 mm	2	13
	8 mm	2	8
	8 mm	2.5	10
	8 mm	2.5	7.5
	8 mm	1.5	9
	8 mm	4	8
	8 mm	2	10
	8 mm	3	6.5
	8 mm	1.5	15.5
	8 mm	3	7.5
	8 mm	2.5	10.5
	8 mm	2	7.5
	8 mm	1	12.5
	8 mm	1.5	10.5
	8 mm	1	12
	8 mm	2	6
	8 mm	2	14.5
	8 mm	1.5	10.5
	8 mm	1	12
	8 mm	2.5	12.5
	8 mm	1.5	8
	8 mm	2	6
	8 mm	2	9.5
	8 mm	1.5	10
	8 mm	1.5	9
	8 mm	2	8
	8 mm	1	19
	8 mm	2.5	12
	8 mm	2.5	8
	8 mm	2	4.5
	8 mm	3	9
	8 mm	1.5	5
	8 mm	2	8.5
	8 mm	1.5	12
	8 mm	4	10.5
	8 mm	2.5	18
	8 mm	1	6
	8 mm	1	15
	8 mm	1	14
	8 mm	2	14.5
	8 mm	2	10.5
	8 mm	1	13
	8 mm	3.5	18
	8 mm	2.5	11.5
	8 mm	2.5	11
	8 mm	1	14
	8 mm	2.5	5.5
	8 mm	2.5	10
	8 mm	1	23
	8 mm	1	7.5
	8 mm	2	9.5
	8 mm	2.5	14.5
	8 mm	2.5	8.5
	8 mm	3	8.5
	8 mm	0.5	8.5
	8 mm	1	9
	8 mm	2	8.5
	8 mm	2.5	10.5
	8 mm	4.5	5
	8 mm	2.5	12.5
	8 mm	2.5	7
	8 mm	1.5	9
	8 mm	2.5	8.5
	8 mm	1.5	7
	8 mm	1.5	14.5
	8 mm	1	10.5
	8 mm	2.5	11.5
	8 mm	2.5	4.5
	8 mm	2	7
	8 mm	2	8
	8 mm	3.5	16.5
	8 mm	1.5	11
	8 mm	3	15.5
	8 mm	3	7.5
	8 mm	3	6
	8 mm	2.5	8.5
	8 mm	3	6
	8 mm	2	3
	8 mm	1	16.5
	8 mm	1.5	4
	8 mm	1.5	9.5
	8 mm	1.5	18.5
	8 mm	2	9
	8 mm	1.5	9
	8 mm	1	4.5
	8 mm	2	8
	8 mm	3	9.5
	8 mm	0.5	3
	8 mm	1.5	6
	8 mm	2.5	14
	8 mm	1	12
	8 mm	2.5	8
	Infinite	1.5	8.5
	Infinite	0.5	6
	Infinite	0.5	9
	Infinite	1.5	7
	Infinite	1.5	4
	Infinite	1.5	7
	Infinite	0.5	5.5
	Infinite	1	6
	Infinite	2	12
	Infinite	1.5	7.5
	Infinite	2	10.5
	Infinite	2	6.5
	Infinite	1	9
	Infinite	1	5.5
	Infinite	1.5	8.5
	Infinite	1	5.5
	Infinite	1	11.5
	Infinite	1	7
	Infinite	2	8
	Infinite	1.5	8.5
	Infinite	1.5	10.5
	Infinite	2	7
	Infinite	0.5	6.5
	Infinite	1	5
	Infinite	2	8.5
	Infinite	1	9
	Infinite	1	11.5
	Infinite	2	10
	Infinite	1	12.5
	Infinite	2	7
	Infinite	1.5	11
	Infinite	1.5	9
	Infinite	1	8
	Infinite	1.5	5
	Infinite	1	6
	Infinite	2	10
	Infinite	1.5	6.5
	Infinite	1	6.5
	Infinite	1.5	8.5
	Infinite	1.5	6.5
	Infinite	1.5	9
	Infinite	1	9.5
	Infinite	1.5	7.5
	Infinite	1.5	9
	Infinite	1	7.5
	Infinite	1	9
	Infinite	1	7.5
	Infinite	1.5	6
	Infinite	1.5	10
	Infinite	1.5	7
	Infinite	1.5	9.5
	Infinite	1	9
	Infinite	1	10
	Infinite	0.5	9
	Infinite	1.5	5
	Infinite	1.5	8
	Infinite	1	12
	Infinite	1	7
	Infinite	2	8.5
	Infinite	1.5	5.5
	Infinite	2.5	3.5
	Infinite	1	7
	Infinite	1	6
	Infinite	1	8
	Infinite	2	7.5
	Infinite	1.5	6.5
	Infinite	0.5	6
	Infinite	1.5	9.5
	Infinite	1.5	6
	Infinite	1	5.5
	Infinite	2	9
	Infinite	1.5	7
	Infinite	1.5	10
	Infinite	1.5	6.5
	Infinite	2	10
	Infinite	0.5	4.5
	Infinite	1	6
	Infinite	1	6
	Infinite	2	7.5
	Infinite	1.5	7.5
	Infinite	1.5	9.5
	Infinite	2	7
	Infinite	1.5	6
	Infinite	1	8
	Infinite	1.5	7.5
	Infinite	1.5	6.5
	Infinite	1	7.5
	Infinite	1.5	5
	Infinite	1.5	10.5
	Infinite	1.5	4.5
	Infinite	1.5	8.5
	Infinite	1	9.5
	Infinite	1	10.5
	Infinite	0.5	8.5
	Infinite	1	5.5
	Infinite	1	8.5
	Infinite	1	7
	Infinite	1.5	9
	Infinite	1	6.5
	Infinite	1	5.5
