# Supplementary figures and images for: Fast and accurate edge orientation processing during object manipulation
Source: eLife journal article supplement (doi:10.7554/elife.31200), 2018-04-03

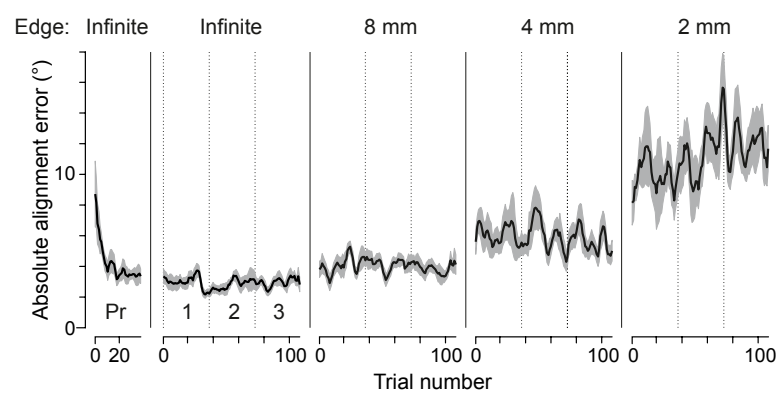

Supplement: supp [file elife_poa_e31200_Figure_1_figure_supplement_1.pdf › elife_poa_e31200_Figure_1_figure_supplement_1.pdf]

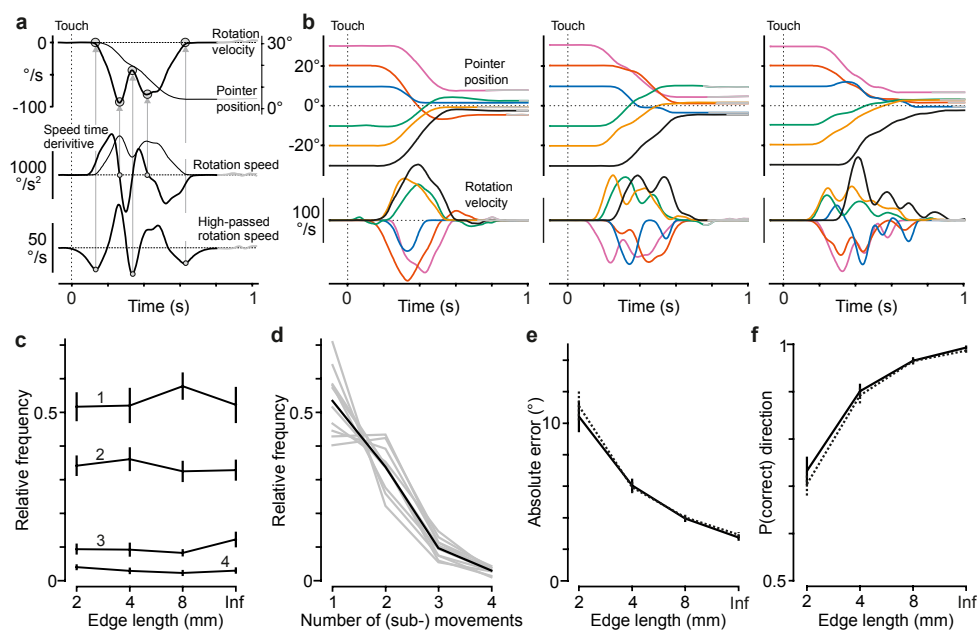

Supplemental Figure 2

Supplement: supp [file elife_poa_e31200_Figure_3_figure_supplement_1.pdf › elife_poa_e31200_Figure_3_figure_supplement_1.pdf]

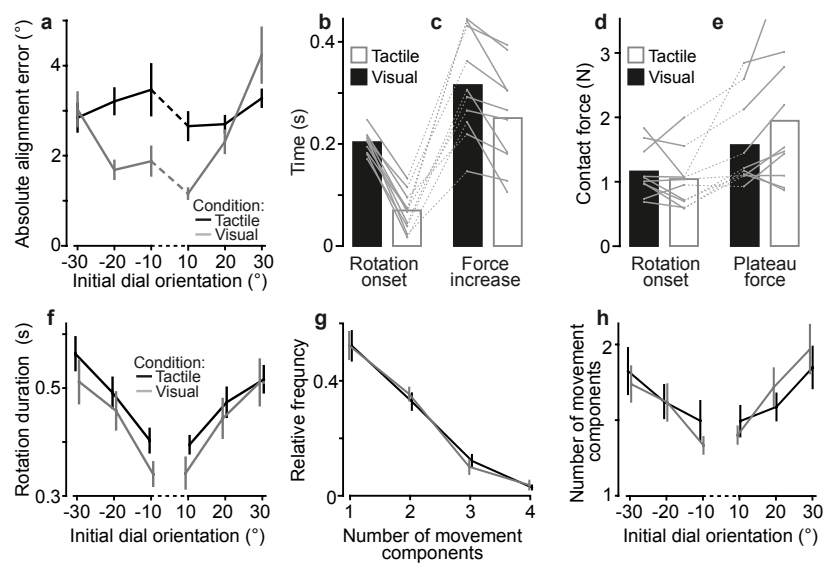

Supplemental Figure 3

Supplement: supp [file elife_poa_e31200_Figure_4_figure_supplement_1.pdf › elife_poa_e31200_Figure_4_figure_supplement_1.pdf]
